# Supplementary material
Source: publisher site journal article supplement (https://www.spandidos-publications.com/6003/downloadSupplementary)
Supplement: Supplementary file 1 [file downloadSupplementary]

## Sheet: Sheet1
Supplementary Table II. Detailed information on the microarray data of GSE78000 obtained from the GEO database. GEO: Gene Expression Omnibus.
Sample	Disease	Gender
GSM2064394	IA	female
GSM2064397	IA	female
GSM2064402	IA	female
GSM2064406	IA	male
GSM2064409	IA	male
GSM2064413	IA	male
GSM2064427	healthy	female
GSM2064433	healthy	female
GSM2064435	healthy	female
GSM2064428	healthy	male
GSM2064429	healthy	male
GSM2064432	healthy	male
